# Supplementary material
Source: MDPI journal article supplement (https://www.mdpi.com/2072-4292/13/9/1849)
Supplement: s1 [file s1]

## Supplementary materials for

### Evaluating of light pollution in global protected areas from 1992 to 2018

Haowei Mu <sup>1,5</sup>, Xuecao Li <sup>1,2\*</sup>, Xiaoping Du <sup>3</sup>, Jianxi Huang <sup>1,2</sup>, Wei Su <sup>1,2</sup>, Tengyun Hu <sup>4</sup>, Yanan Wen <sup>1,5</sup>, Peiyi Yin <sup>1</sup>, Yuan Han <sup>3</sup>, and Fei Xue <sup>6</sup>

- <sup>1</sup> College of Land Science and Technology, China Agricultural University, Beijing, 100083, China; [xuecaoli@cau.edu.cn](mailto:xuecaoli@cau.edu.cn) (X. L.); [jxhuang@cau.edu.cn](mailto:jxhuang@cau.edu.cn) (J. H.); [suwei@cau.edu.cn](mailto:suwei@cau.edu.cn) (W. S.); [peiyiyin@163.com](mailto:peiyiyin@163.com) (P.Y.)
  - <sup>2</sup> Key Laboratory of Remote Sensing for Agri-Hazards, Ministry of Agriculture and Rural Affairs, Beijing 100083, China;
  - <sup>3</sup> Key Laboratory of Digital Earth Science, Institute of Remote Sensing and Digital Earth, Chinese Academy of Sciences, Beijing 100094, China; [duxp@radi.ac.cn](mailto:duxp@radi.ac.cn) (X. D.); [hanyuan@aircas.ac.cn](mailto:hanyuan@aircas.ac.cn) (Y. H.);
  - <sup>4</sup> Beijing Municipal Institute of City Planning and Design, Beijing 100045, China; [hutengyun@bmicpd.com.cn](mailto:hutengyun@bmicpd.com.cn) (T. H.);
  - <sup>5</sup> Faculty of Geomatics, Lanzhou Jiaotong University, Lanzhou, 730070, China; [0218742@stu.lzjtu.edu.cn](mailto:0218742@stu.lzjtu.edu.cn) (H. M.); [0218752@stu.lzjtu.edu.cn](mailto:0218752@stu.lzjtu.edu.cn) (Y. W.)
  - <sup>6</sup> Faculty of Architecture, Civil and Transportation Engineering, Beijing University of Technology, Beijing, 100000, China; [xuefei@BJUT.edu.cn](mailto:xuefei@BJUT.edu.cn) (F. X.)
- \* Correspondence: [xuecaoli@cau.edu.cn](mailto:xuecaoli@cau.edu.cn)

#### Supplementary Figures:

Figure S1-3

**Figure. S1**

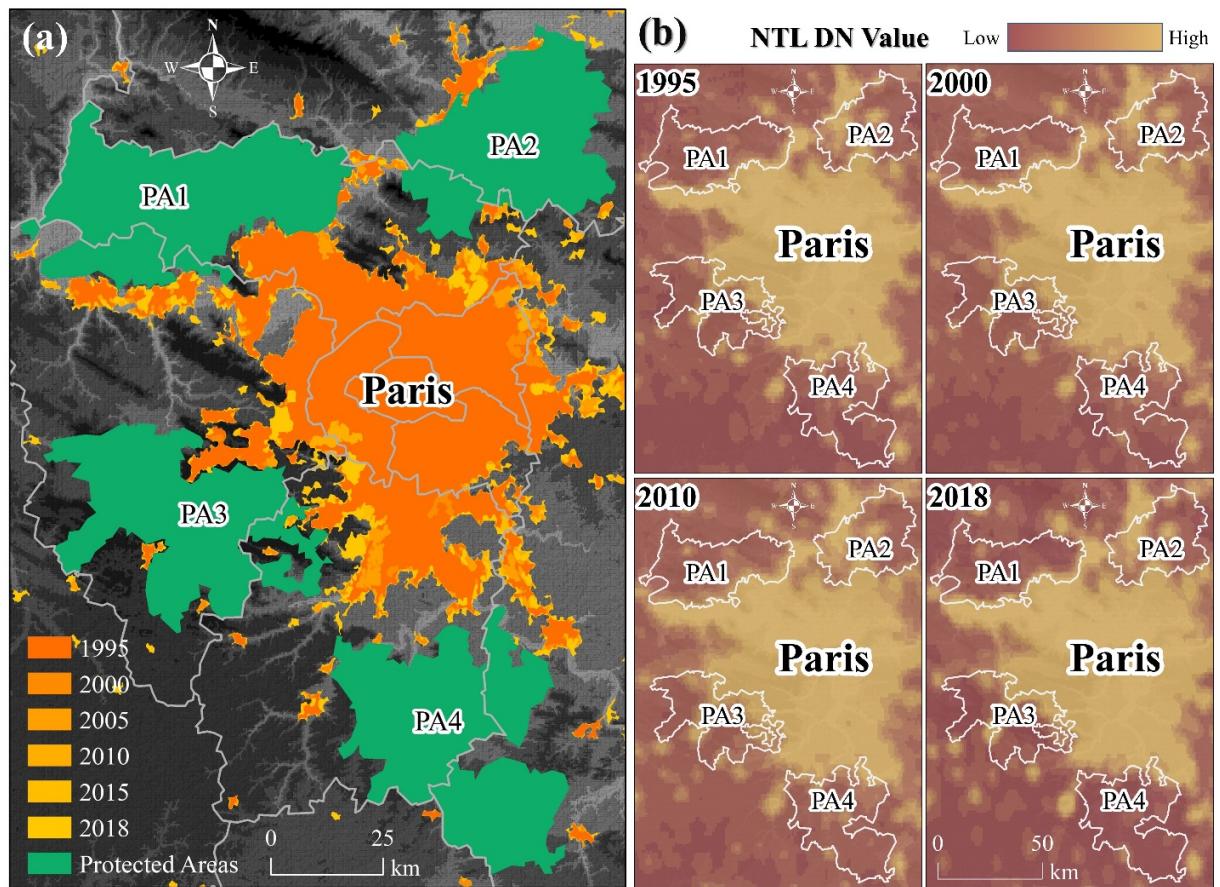

**Figure. S1.** An illustration of continuously polluted category. The case area in Paris (France) (a) and change of nightlights (b).

**Figure. S2**

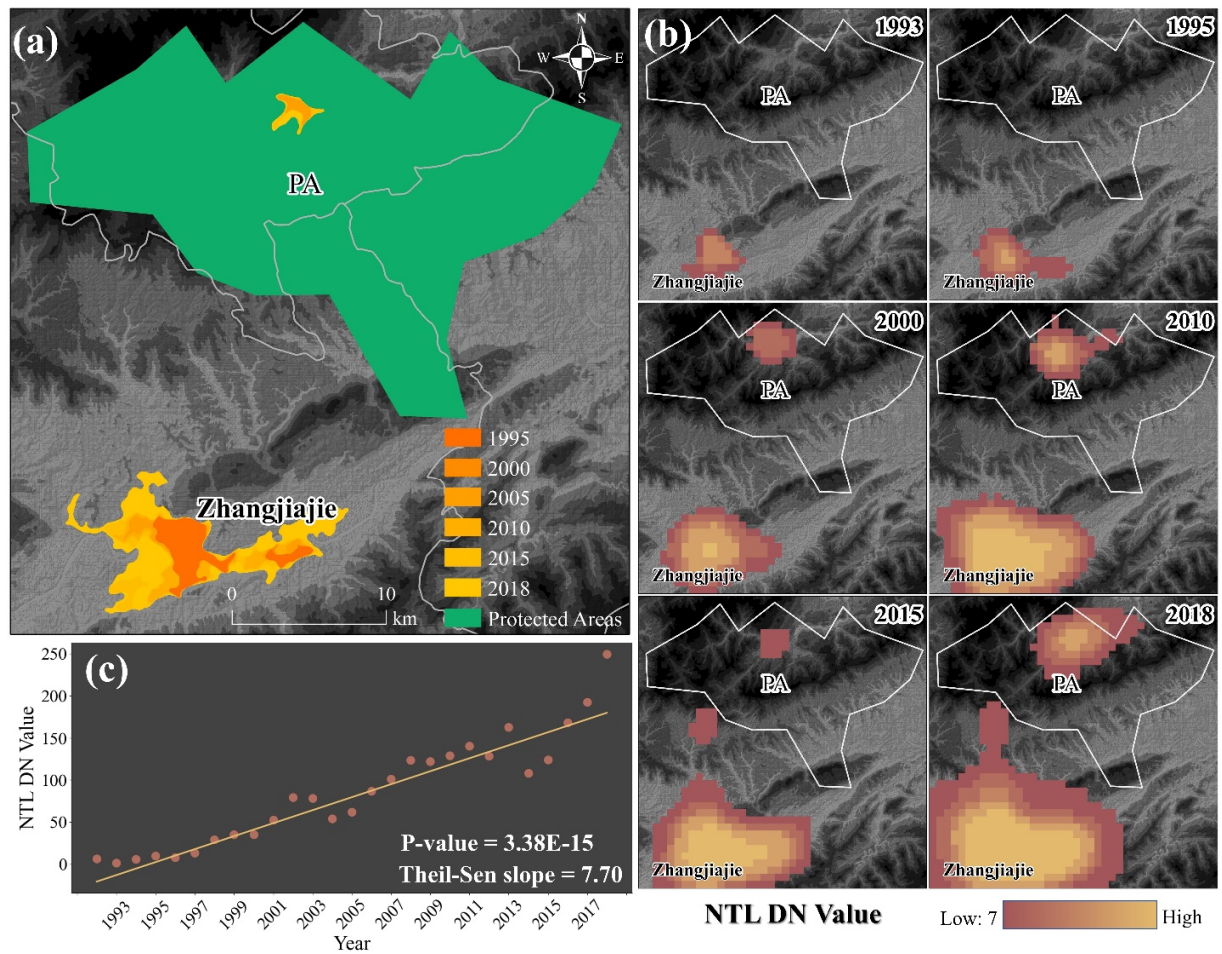

**Figure. S2.** An illustration of the discontinuously polluted category in Zhangjiajie (China) (a) with NTL dynamics (b) and temporal trend analysis (c).



**Figure. S3**

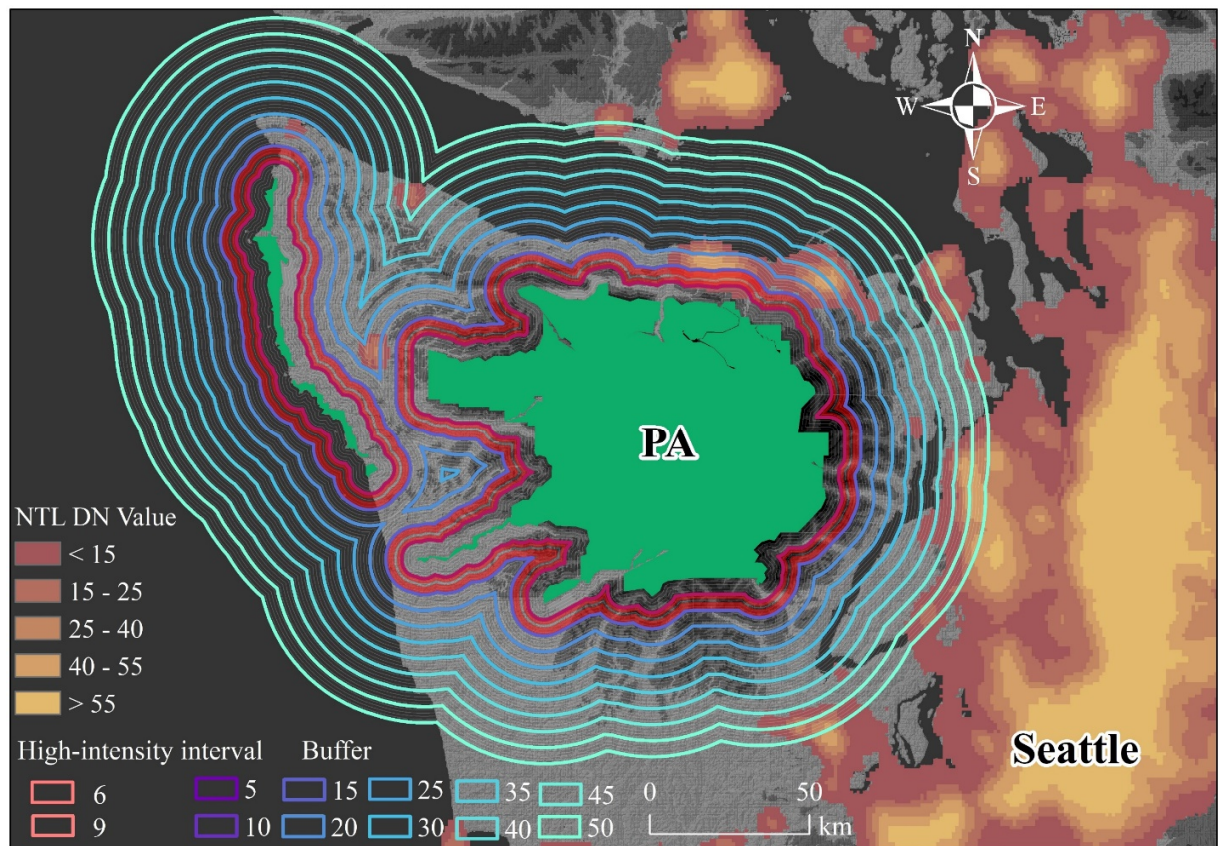

**Figure. S3.** An illustration of buffers around the protected area in Seattle and the highlighted high-intensity intervals.
